# Supplementary material for: Characterization of the Complete Chloroplast Genome of the Dragonhead Herb, Dracocephalumheterophyllum (Lamiaceae), and Comparative Analyses with Related Species
Source: MDPI journal article supplement (doi:10.3390/d14020110), 2022-02-03
Supplement: s1 [file s1]

**Table S1.** Information of reported chloroplast genomes that was used for phylogenetic trees constructing.

| Species                                        | No. accessions |
|------------------------------------------------|----------------|
| <i>Dracocephalum heterophyllum</i>             | MW970109       |
| <i>Dracocephalum moldavica</i>                 | MT457747.1     |
| <i>Dracocephalum palmatum</i>                  | NC_031874.1    |
| <i>Dracocephalum tanguticum</i>                | MT457746.1     |
| <i>Mentha longifolia</i>                       | NC_032054.1    |
| <i>Mentha spicata</i>                          | NC_037247.1    |
| <i>Salvia japonica</i>                         | NC_035233.1    |
| <i>Salvia miltiorrhiza</i>                     | JX312195.1     |
| <i>Perilla citriodora</i>                      | KT220690.1     |
| <i>Perilla frutescens</i> var. <i>Hirtella</i> | KT220691.1     |
| <i>Perilla setoyensis</i>                      | KT220692.1     |
| <i>Elsholtzia densa</i>                        | MN793319.1     |
| <i>Elsholtzia splendens</i>                    | MH700782.1     |
| <i>Ocimum basilicum</i>                        | NC_035143.1    |
| <i>Ocimum tenuiflorum</i> cv. <i>Krishna</i>   | NC_043873.1    |
| <i>Pogostemon cablin</i>                       | MF287372.1     |
| <i>Pogostemon stellatus</i>                    | NC_031434.1    |
| <i>Stachys coccinea</i>                        | NC_029823.1    |
| <i>Stachys sylvatica</i>                       | NC_029824.1    |
| <i>Scutellaria baicalensis</i>                 | MF521633.1     |
| <i>Scutellaria insignis</i>                    | NC_028533.1    |
| <i>Plantago depressa</i>                       | NC_041161.1    |
