# Supplementary material for: Characterization of the Complete Chloroplast Genome of the Dragonhead Herb, Dracocephalumheterophyllum (Lamiaceae), and Comparative Analyses with Related Species
Source: MDPI journal article supplement (doi:10.3390/d14020110), 2022-02-03
Supplement: s1 [file s1]

**Table S2.** Length of genes with introns in the cp genomes of *D. heterophyllum*, *D. moldavica*, *D. tanguticum* and *D. taliense*.

*D. h.*: *D. heterophyllum*; *D. m.*: *D. moldavica*; *D. tan.*: *D. tanguticum*; *D. tal.*: *D. taliense*

| Gene            | Exon 1      |             |               |               | Exon 2      |             |               |               | Exon 3      |             |               |               | Intron 1    |             |               |               | Intron 2    |             |               |               |
|-----------------|-------------|-------------|---------------|---------------|-------------|-------------|---------------|---------------|-------------|-------------|---------------|---------------|-------------|-------------|---------------|---------------|-------------|-------------|---------------|---------------|
|                 | Species     |             |               |               |             |             |               |               |             |             |               |               |             |             |               |               |             |             |               |               |
|                 | <i>D. h</i> | <i>D. m</i> | <i>D. tan</i> | <i>D. tal</i> | <i>D. h</i> | <i>D. m</i> | <i>D. tan</i> | <i>D. tal</i> | <i>D. h</i> | <i>D. m</i> | <i>D. tan</i> | <i>D. tal</i> | <i>D. h</i> | <i>D. m</i> | <i>D. tan</i> | <i>D. tal</i> | <i>D. h</i> | <i>D. m</i> | <i>D. tan</i> | <i>D. tal</i> |
| <i>atpF</i>     | 387         | 411         | 385           | 408           | 150         | 144         | 152           | 144           |             |             |               |               | 713         | 700         | 708           | 695           |             |             |               |               |
| <i>clpP</i>     | 230         | 228         | 228           | 228           | 292         | 292         | 292           | 292           | 69          | 71          | 71            | 71            | 647         | 627         | 648           | 637           | 721         | 694         | 693           | 693           |
| <i>ndhA</i>     | 539         | 539         | 539           | 539           | 553         | 553         | 553           | 556           |             |             |               |               | 1007        | 998         | 1006          | 1002          |             |             |               |               |
| <i>ndhB</i>     | 756         | 756         | 756           | 756           | 777         | 777         | 777           | 777           |             |             |               |               | 679         | 679         | 679           | 679           |             |             |               |               |
| <i>petB</i>     | 6           | 6           | 6             | 6             | 642         | 642         | 642           | 642           |             |             |               |               | 732         | 740         | 726           | 728           |             |             |               |               |
| <i>petD</i>     | 8           | 8           | 8             | 8             | 475         | 475         | 475           | 475           |             |             |               |               | 709         | 709         | 710           | 710           |             |             |               |               |
| <i>rpl16</i>    | 399         | 399         | 399           | 399           | 9           | 9           | 9             | 9             |             |             |               |               | 882         | 885         | 876           | 874           |             |             |               |               |
| <i>rpl2</i>     | 434         | 434         | 434           | 470           | 391         | 391         | 391           | 394           |             |             |               |               | 663         | 663         | 663           | 624           |             |             |               |               |
| <i>rpoC1</i>    | 1622        | 1626        | 1620          | 1620          | 433         | 456         | 456           | 456           |             |             |               |               | 768         | 763         | 768           | 768           |             |             |               |               |
| <i>rps12</i>    | 114         | 114         | 114           | 114           | 232         | 232         | 232           | 232           | 26          | 26          | 26            | 26            | 528         | 528         | 538           | 538           |             |             |               |               |
| <i>rps16</i>    | 225         | 225         | 225           | 225           | 42          | 42          | 42            | 42            |             |             |               |               | 874         | 872         | 871           | 871           |             |             |               |               |
| <i>trnA-UGC</i> | 38          | 38          | 38            | 38            | 35          | 35          | 35            | 35            |             |             |               |               | 803         | 803         | 803           | 803           |             |             |               |               |
| <i>trnG-UCC</i> | 23          | 23          | 23            | 23            | 47          | 47          | 47            | 48            |             |             |               |               | 691         | 686         | 684           | 685           |             |             |               |               |
| <i>trnI-GAU</i> | 37          | 37          | 37            | 37            | 35          | 35          | 35            | 35            |             |             |               |               | 944         | 949         | 949           | 949           |             |             |               |               |
| <i>trnK-UUU</i> | 35          | 35          | 35            | 35            | 37          | 37          | 37            | 37            |             |             |               |               | 2535        | 2510        | 2546          | 2550          |             |             |               |               |
| <i>trnL-UAA</i> | 38          | 38          | 38            | 37            | 49          | 49          | 49            | 50            |             |             |               |               | 495         | 487         | 500           | 497           |             |             |               |               |
| <i>trnV-UAC</i> | 37          | 37          | 37            | 37            | 36          | 36          | 36            | 36            |             |             |               |               | 580         | 578         | 577           | 577           |             |             |               |               |
| <i>ycf3</i>     | 155         | 153         | 153           | 150           | 229         | 228         | 228           | 235           | 129         | 129         | 129           | 134           | 734         | 729         | 748           | 732           | 721         | 705         | 707           | 701           |
