# Supplementary material for: Characterization of the Complete Chloroplast Genome of the Dragonhead Herb, Dracocephalumheterophyllum (Lamiaceae), and Comparative Analyses with Related Species
Source: MDPI journal article supplement (doi:10.3390/d14020110), 2022-02-03
Supplement: s1 [file s1]

**Table S6.** The codon usage frequency for the cp genome of *D. heterophyllum*.

| Codon | Codon type | Number | RSCU | Codon | Codon type | Number | RSCU |
|-------|------------|--------|------|-------|------------|--------|------|
| Phe   | UUU        | 1,057  | 1.35 | Ala   | GCA        | 426    | 1.15 |
| Phe   | UUC        | 506    | 0.65 | Ala   | GCG        | 172    | 0.47 |
| Leu   | UUA        | 943    | 1.9  | Tyr   | UAU        | 826    | 1.57 |
| Leu   | UUG        | 634    | 1.28 | Tyr   | UAC        | 224    | 0.43 |
| Leu   | CUU        | 608    | 1.22 | TER   | UAA        | 45     | 1.59 |
| Leu   | CUC        | 194    | 0.39 | TER   | UAG        | 19     | 0.67 |
| Leu   | CUA        | 404    | 0.81 | TER   | UGA        | 21     | 0.74 |
| Leu   | CUG        | 199    | 0.40 | His   | CAU        | 512    | 1.49 |
| Ile   | AUU        | 1,184  | 1.48 | His   | CAC        | 176    | 0.51 |
| Ile   | AUC        | 459    | 0.57 | Gln   | CAA        | 751    | 1.50 |
| Ile   | AUA        | 764    | 0.95 | Gln   | CAG        | 248    | 0.50 |
| Met   | AUG        | 656    | 1.00 | Asn   | AAU        | 1,074  | 1.52 |
| Val   | GUU        | 580    | 1.52 | Asn   | AAC        | 337    | 0.48 |
| Val   | GUC        | 171    | 0.45 | Lys   | AAA        | 1,184  | 1.49 |
| Val   | GUA        | 557    | 1.46 | Lys   | AAG        | 403    | 0.51 |
| Val   | GUG        | 217    | 0.57 | Asp   | GAU        | 926    | 1.59 |
| Ser   | UCU        | 616    | 1.68 | Asp   | GAC        | 239    | 0.41 |
| Ser   | UCC        | 368    | 1.01 | Glu   | GAA        | 1,120  | 1.51 |
| Ser   | UCA        | 432    | 1.18 | Glu   | GAG        | 360    | 0.49 |
| Ser   | UCG        | 204    | 0.56 | Cys   | UGU        | 260    | 1.55 |
| Ser   | AGU        | 443    | 1.21 | Cys   | UGC        | 75     | 0.45 |
| Ser   | AGC        | 131    | 0.36 | Trp   | UGG        | 489    | 1.00 |
| Pro   | CCU        | 444    | 1.44 | Arg   | CGU        | 350    | 1.22 |
| Pro   | CCC        | 264    | 0.86 | Arg   | CGC        | 131    | 0.46 |
| Pro   | CCA        | 326    | 1.06 | Arg   | CGA        | 359    | 1.25 |
| Pro   | CCG        | 197    | 0.64 | Arg   | CGG        | 173    | 0.60 |
| Thr   | ACU        | 564    | 1.57 | Arg   | AGA        | 537    | 1.87 |
| Thr   | ACC        | 290    | 0.81 | Arg   | AGG        | 176    | 0.61 |
| Thr   | ACA        | 421    | 1.18 | Gly   | GGU        | 598    | 1.21 |
| Thr   | ACG        | 158    | 0.44 | Gly   | GGC        | 223    | 0.45 |
| Ala   | GCU        | 613    | 1.66 | Gly   | GGA        | 759    | 1.54 |
| Ala   | GCC        | 265    | 0.72 | Gly   | GGG        | 395    | 0.80 |
