# Supplementary material for: Characterization of the Complete Chloroplast Genome of the Dragonhead Herb, Dracocephalumheterophyllum (Lamiaceae), and Comparative Analyses with Related Species
Source: MDPI journal article supplement (doi:10.3390/d14020110), 2022-02-03
Supplement: s1 [file s1]

**Table S9.** The  $K_a/K_s$  value of 48 PCGs in three compares (*D. heterophyllum* vs *D. moldavica*, *D. heterophyllum* vs *D. palmatum* and *D. heterophyllum* vs *D. tanguticum*).

| Gene         | <i>D. heterophyllum</i> vs <i>D. moldavica</i> | <i>D. heterophyllum</i> vs <i>D. palmatum</i> | <i>D. heterophyllum</i> vs <i>D. tanguticum</i> |
|--------------|------------------------------------------------|-----------------------------------------------|-------------------------------------------------|
| <i>matK</i>  | 0.5833                                         | 0.6606                                        | 0.8029                                          |
| <i>atpA</i>  | 0.0251                                         | 0.0366                                        | 0.0273                                          |
| <i>atpF</i>  | 0.5995                                         | 0.4980                                        | 0.4414                                          |
| <i>atpI</i>  | 0.1025                                         | 0.1873                                        | 0.0796                                          |
| <i>rpoC2</i> | 0.1904                                         | 0.2791                                        | 0.2977                                          |
| <i>rpoC1</i> | 0.1372                                         | 0.1509                                        | 0.1179                                          |
| <i>rpoB</i>  | 0.0940                                         | 0.0704                                        | 0.1595                                          |
| <i>psbD</i>  | 0.0984                                         | 0.0000                                        | 0.0000                                          |
| <i>psaB</i>  | 0.0426                                         | 0.0750                                        | 0.1125                                          |
| <i>psaA</i>  | 0.0344                                         | 0.0438                                        | 0.0462                                          |
| <i>rps4</i>  | 0.1526                                         | 0.1847                                        | 0.3118                                          |
| <i>ndhJ</i>  | 0.3811                                         | 0.2877                                        | 0.2135                                          |
| <i>ndhK</i>  | 0.1250                                         | 0.2108                                        | 0.2379                                          |
| <i>ndhC</i>  | 0.2975                                         | 0.5950                                        | 0.0000                                          |
| <i>atpE</i>  | 0.2995                                         | 0.0752                                        | 0.0000                                          |
| <i>rbcL</i>  | 0.0954                                         | 0.0465                                        | 0.0946                                          |
| <i>accD</i>  | 0.3597                                         | 0.3722                                        | 0.4119                                          |
| <i>psaI</i>  | —                                              | —                                             | 0.8775                                          |
| <i>ycf4</i>  | 0.0000                                         | 0.1039                                        | 0.1569                                          |
| <i>cemA</i>  | 0.3345                                         | 0.7971                                        | 0.6739                                          |
| <i>petA</i>  | 0.1675                                         | 0.3060                                        | 0.4305                                          |
| <i>petL</i>  | 0.7250                                         | 0.0000                                        | —                                               |
| <i>rpl33</i> | 0.5447                                         | —                                             | —                                               |
| <i>rpl20</i> | 0.0591                                         | 0.0488                                        | 0.1000                                          |
| <i>rps12</i> | —                                              | 0.9400                                        | —                                               |
| <i>clpP</i>  | 0.0000                                         | 0.0756                                        | 0.0000                                          |
| <i>psbB</i>  | 0.0000                                         | 0.0000                                        | 0.0324                                          |
| <i>petB</i>  | 0.0000                                         | 0.1043                                        | 0.0000                                          |
| <i>petD</i>  | 0.0000                                         | 0.3238                                        | 0.0000                                          |
| <i>rpoA</i>  | 0.2344                                         | 0.2232                                        | 0.1866                                          |
| <i>rps11</i> | 2.0439                                         | 1.5296                                        | 1.5296                                          |
| <i>infA</i>  | 0.1177                                         | 0.1177                                        | 0.1489                                          |
| <i>rps8</i>  | 0.4806                                         | 0.3204                                        | 0.0793                                          |
| <i>rpl16</i> | 0.3317                                         | 0.3317                                        | 0.4901                                          |

—Indicates the value of  $K_a$  is zero
