# Supplementary material for: Characterization of the Complete Chloroplast Genome of the Dragonhead Herb, Dracocephalumheterophyllum (Lamiaceae), and Comparative Analyses with Related Species
Source: MDPI journal article supplement (doi:10.3390/d14020110), 2022-02-03
Supplement: s1 [file s1]

**Table S4.** Statistics of identified simple sequence repeats in the chloroplast genome of

| SSR type   | Ratio (%) | Repeat unit                                                                                                                                                                                                                              | Location                               |
|------------|-----------|------------------------------------------------------------------------------------------------------------------------------------------------------------------------------------------------------------------------------------------|----------------------------------------|
| Mono (29)  | 32.2      | A (13), T (16)                                                                                                                                                                                                                           | LSC (23), IRB (2), SSC (2), IRA (2)    |
| Di (3)     | 3.3       | AT (3)                                                                                                                                                                                                                                   | LSC (3)                                |
|            |           | AAC (2), TTA (4), ATG (3), TTC (3), TCT (2), GCA (1), AAT (3), GTA (1), ATA (1), ATT (4), TTG (3), GGA (1), TAT (1), TAA (1), ATC (1), TGC (1), TGA (1), GAA (1), AGA (2), CTG (1), CAA (1), GCT (1), AGA (1), CTT (1), CAG (1), TCA (1) | LSC (23), IRB (6), SSC (8), IRA (6)    |
| Tetra (3)  | 3.3       | TCTA (1), TTTC (1), AACA (1)                                                                                                                                                                                                             | LSC (2), SSC (1)                       |
| Penta (2)  | 3.3       | TAAAA (1), TATTT (1)                                                                                                                                                                                                                     | LSC (2)                                |
|            |           | (T)10c(A)10 (1), (A)14...(TAAA)3 (1), (TAT)3...(ATA)3...(AAG)3 (1), (T)10...(A)11 (1), (T)11...(TAA)3 (1), (TGC)3...(TTA)3 (1), (T)10...(CTT)3 (1), (TCT)3...(CTT)3 (1), (AAG)3...(AGA)3 (1), (GAA)3...(A)10 (1)                         | LSC (6), IRB (2), IRA (2)              |
| C (10)     | 11.1      |                                                                                                                                                                                                                                          |                                        |
| Total (90) | 100       | 44                                                                                                                                                                                                                                       | LSC (59), IRB (10), SSC (11), IRA (10) |

*Dracocephalum heterophyllum* (Lamiaceae).
